# Supplementary material
Source: publisher figshare collection journal article supplement (https://tandf.figshare.com/ndownloader/files/15135533)
Supplement: Supplementary file 1 [file 15135533]

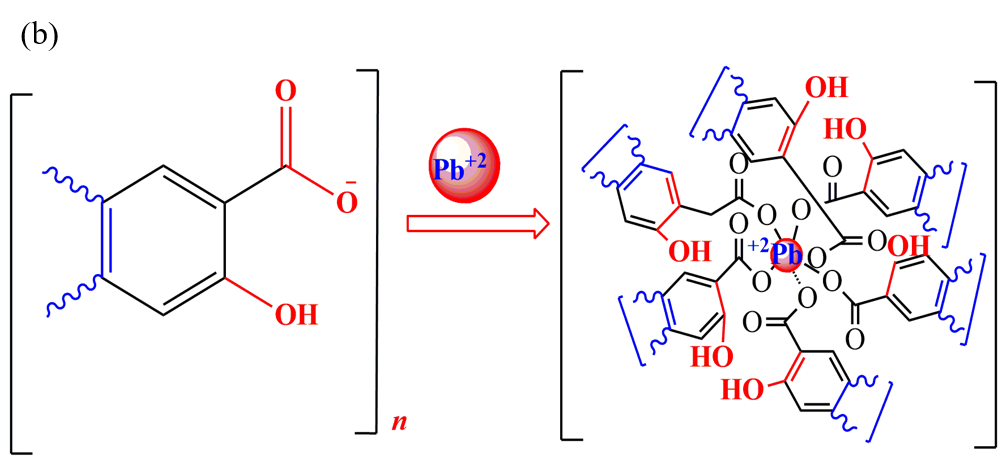


**Supplementary Fig 1:** Mechanism involved in Pb (II) adsorption from solution to the MOL surface


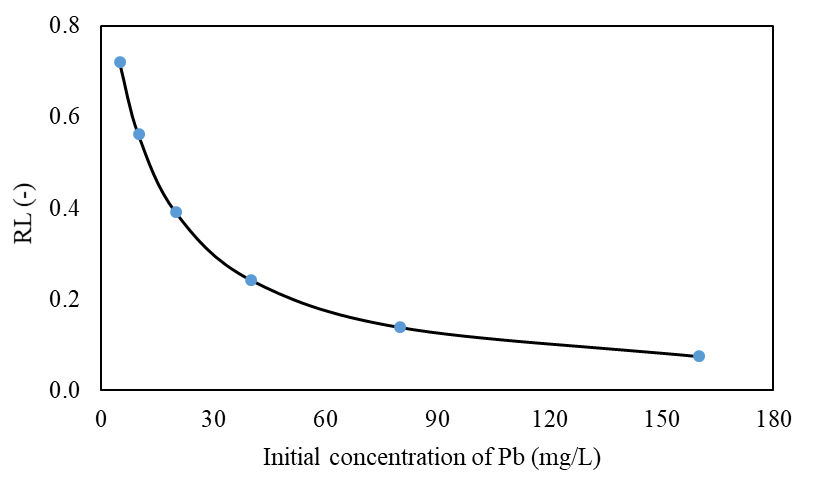


**Supplementary Fig 2:** The effect of initial concentration on separation factor (RL) to check suitability of model for adsorption of Pb (II).

**Supplementary Table 1:** Characteristics of groundwater samples (GW1 and GW2) collected from Vehari and Burewala used to quantify the impact of coexisting inorganic ions on the removal of Pb (II) from contaminated water.

| **Characteristics** | **Units** | **GW1 (Burewala)** | **GW2 (Vehari)** |
| --- | --- | --- | --- |
| EC | dS m-1 | 2.93±0.15 | 0.97±0.07 |
| TDS | mg L-1 | 1460±15.1 | 480±8.1 |
| Mg | mg L-1 | 60±3.2 | 45±2 |
| Na | mg L-1 | 287±7.3 | 50.3±4 |
| K | mg L-1 | 19.5±1.8 | 5±0.25 |
| Ca | mg L-1 | 129±6.3 | 34.9±4 |
| CO3 | mg L-1 | 98±3.8 | 60±4 |
| HCO3 | mg L-1 | 183±6 | 244±8.4 |
| Cl | mg L-1 | 1416±10 | 566.4±8 |
| Pb (II) | µg L-1 | 30±3.6 | 18±3.2 |
| Cd | µg L-1 | 20±1.5 | 26±19 |
| As | µg L-1 | 56±4.2 | 22±2 |
